**Type of article:** Research article

1 First and second waves of coronavirus disease-19: A comparative study in  
2 hospitalized patients in Reus, Spain

3  
4 **Simona Iftimie**<sup>1</sup>, **Ana F. López-Azcona**<sup>1</sup>, **Immaculada Vallverdú**<sup>2</sup>, **Salvador Hernández-Flix**  
5 **<sup>3</sup>**, **Gabriel de Febrer**<sup>4</sup>, **Sandra Parra**<sup>1</sup>, **Anna Hernández-Aguilera**<sup>5,6</sup>, **Francesc Riu**<sup>5</sup>, **Jorge**  
6 **Joven**<sup>6</sup>, **Jordi Camps**<sup>6,\*</sup>, **Antoni Castro**<sup>1</sup>, and the **REUSCOVID Study Group**

7 <sup>1</sup> Department of Internal Medicine, Hospital Universitari de Sant Joan, Institut d'Investigació  
8 Sanitària Pere Virgili, Universitat Rovira i Virgili, Reus, Spain

9 <sup>2</sup> Intensive Care Unit, Hospital Universitari de Sant Joan, Institut d'Investigació Sanitària Pere  
10 Virgili, Universitat Rovira i Virgili, Reus, Spain

11 <sup>3</sup> Section of Pneumology, Hospital Universitari de Sant Joan, Institut d'Investigació Sanitària Pere  
12 Virgili, Universitat Rovira i Virgili, Reus, Spain

13 <sup>4</sup> Intermediate Care Unit, Hospital Universitari de Sant Joan, Institut d'Investigació Sanitària Pere  
14 Virgili, Universitat Rovira i Virgili, Reus, Spain

15 <sup>5</sup> Department of Pathology, Hospital Universitari de Sant Joan, Institut d'Investigació Sanitària Pere  
16 Virgili, Universitat Rovira i Virgili, Reus, Spain

17 <sup>6</sup> Unitat de Recerca Biomèdica, Hospital Universitari de Sant Joan, Institut d'Investigació Sanitària  
18 Pere Virgili, Universitat Rovira i Virgili, Reus, Spain

19

20

21 **Short title:** Comparison between the first and the second waves of COVID-19

22 **Collaborators of the REUSCOVID Study Group:**

23 (In alphabetical order)

24 Natàlia Andreychuk, Gerard Baiges-Gaya, Frederic Ballester, Marc Benavent, José Burdeos, Alba  
25 Català, Èric Castañé, Helena Castañé, Josep Colom, Mireia Feliu, Xavier Gabaldó, Diana Garrido,  
26 Pedro Garrido, Joan Gil, Paloma Guelbenzu, Carolina Lozano, Francesc Marimon, Pedro Pardo,  
27 Isabel Pujol, Antoni Rabassa, Laia Revuelta , Marta Rios, Neus Rius-Gordillo, Elisabet Rodríguez-  
28 Tomàs, Wojciech Rojewski, Esther Roquer-Fanlo, Noèlia Sabaté, Anna Texidó, Carlos Vasco.

29

30  
31  
32

## 32 Abstract

33 Many countries have seen a two-wave pattern in reported cases of coronavirus disease-19  
34 during the 2020 pandemic, with a first wave during spring followed by the current second wave in  
35 late summer and autumn. Empirical data show that the characteristics of the effects of the virus do  
36 vary between the two periods. Differences in age range and severity of the disease have been  
37 reported, although the comparative characteristics of the two waves still remain largely unknown.  
38 Those characteristics are compared in this study using data from two equal periods of 3 and a half  
39 months. The first period, between 15<sup>th</sup> March and 30<sup>th</sup> June, corresponding to the entire first wave,  
40 and the second, between 1<sup>st</sup> July and 15<sup>th</sup> October, corresponding to part of the second wave, still  
41 present at the time of writing this article. Two hundred and four patients were hospitalized during  
42 the first period, and 264 during the second period. Patients in the second wave were younger and  
43 the duration of hospitalization and case fatality rate were lower than those in the first wave. In the  
44 second wave, there were more children, and pregnant and post-partum women. The most frequent  
45 signs and symptoms in both waves were fever, dyspnea, pneumonia, and cough, and the most  
46 relevant comorbidities were cardiovascular diseases, type 2 diabetes mellitus, and chronic  
47 neurological diseases. Patients from the second wave more frequently presented renal and  
48 gastrointestinal symptoms, were more often treated with non-invasive mechanical ventilation and  
49 corticoids, and less often with invasive mechanical ventilation, conventional oxygen therapy and  
50 anticoagulants. Several differences in mortality risk factors were also observed. These results might  
51 help to understand the characteristics of the second wave and the behaviour and danger of SARS-  
52 CoV-2 in the Mediterranean area and in Western Europe. Further studies are needed to confirm our  
53 findings.

54

55 **Keywords:** COVID-19; Epidemiology; Mortality; Pandemic; SARS-CoV-2.

## 56 Introduction

57 Coronavirus disease-19 (COVID-19), produced by the severe acute respiratory syndrome  
58 coronavirus 2 (SARS-CoV-2), has become a global pandemic, giving rise to a serious health threat  
59 globally. Several countries have seen a two-wave pattern of reported cases, with a first wave in  
60 spring and a second in late summer and autumn [1-6]. In Spain, the first wave of COVID-19 began  
61 in early March 2020, although some isolated cases had been reported in February [7]. As a  
62 consequence of the first outbreak, the Spanish Government introduced a series of strict prevention  
63 measures, including home confinement, which lasted from 13<sup>th</sup> March to 4<sup>th</sup> May, followed by a  
64 three-month period of progressively increasing social interaction, work and commercial activity. As  
65 of July, life in the country had returned to relative normality, except for the mandatory wearing of a  
66 face mask and maintaining a safe social distance. Unfortunately, the number of cases of patients  
67 with COVID-19 began to increase towards the end of August and a month later it once again  
68 presented numbers similar to those in April. This forced the Government to reintroduce serious  
69 restrictive measures, including local and regional lockdowns, closures of bars, restaurants, cultural  
70 and sports activities, and a general curfew after 10 pm. The second wave of COVID-19 had been  
71 predicted months earlier and had already occurred in other countries [4]. The vast majority of  
72 Western European countries are currently suffering the consequences of this second wave and are  
73 taking similar restrictive measures. However, empirical data would suggest that this second wave  
74 differs from the first in such factors as age range and severity of the disease [8]. Indeed, it has been  
75 suggested that this second wave in Europe might be linked to the appearance of a new variant of the  
76 SARS-CoV-2, termed 20A.EU1, which appears to have originated in Spain, from where it then  
77 spread to the rest of Europe through tourists who had spent their summer holidays in that area [9].  
78 The similarities and differences between the characteristics of the two waves remain largely  
79 unknown. Population comparison is difficult because the technological and logistical capacity of the  
80 countries in detection and diagnosis of asymptomatic patients and those with mild symptoms has

81 improved greatly in the six months since spring, and it is assumed that the incidence of infection in  
82 the early months of the pandemic was much higher than had been reported [10]. However, a more  
83 accurate comparison of the two waves is feasible through the study of the hospitalized patients for  
84 whom disease was confirmed by reverse transcription-polymerase chain reaction (RT-PCR) and  
85 severe symptoms.

86 This study investigated the severity and characteristics of the two waves in hospitalized  
87 patients in Reus, Spain. We evaluated age, gender, symptoms, comorbidities, mortality, supportive  
88 care, medication, and the outcome for the patient.

## 89 **Materials and Methods**

### 90 **Study design**

91 We conducted a prospective study of all hospitalized cases of SARS-CoV-2 infection in  
92 *Hospital Universitari de Sant Joan*, in Reus, Spain, admitted between 15<sup>th</sup> March and 15<sup>th</sup> October  
93 2020. All patients admitted up to 30<sup>th</sup> June were considered to be in the first wave and all those  
94 admitted from 1<sup>st</sup> July in the second wave, which divided the study period into two equal parts of  
95 three and a half months. The only inclusion criterion was to be a hospitalized patient with an  
96 analytical diagnosis of SARS-CoV-2. We excluded those with suspected SARS-CoV-2 infection but  
97 had no laboratory confirmation and those who came to the hospital with symptoms compatible with  
98 COVID-19 but did not require hospitalization. SARS-CoV-2 infection was confirmed by RT-PCR  
99 using swab samples from the upper respiratory tract (nasopharyngeal/oropharyngeal exudate), from  
100 the lower respiratory tract (sputum/endotracheal aspirate/bronchoalveolar lavage/bronchial aspirate)  
101 or from the lower digestive tract (rectal smear). Tests were carried out with the VIASURE *SARS-*  
102 *CoV-2* Real Time PCR Detection Kit (CerTest Biotec, Zaragoza, Spain), or with the Procleix®  
103 method in a Panther automated extractor and amplifier (Grifols Laboratories, Barcelona, Spain).  
104 This study was approved by the *Comitè d'Ètica i Investigació en Medicaments* (Institutional

105 Review Board) of *Hospital Universitari de Sant Joan* (Resolution CEIM 040/2018, amended on 16  
106 April 2020).

### 107 **Calculation of sample size**

108 Accepting an alpha risk of 0.05 and a beta risk of less than 0.2 in a bilateral contrast, it takes  
109 137 subjects in the first wave and 105 in the second wave to detect a difference equal to or greater  
110 than 8 years in the variable age. The common standard deviation is assumed to be 22. A follow-up  
111 loss rate of 0% was estimated.

### 112 **Statistical analyses**

113 Data is given as numbers and percentages or means and standard deviations. Statistical  
114 comparisons between two groups were made using the  $\chi^2$  test (categorical variables) or the  
115 Student's *t* test. Logistic regression models were fitted to investigate the combined effect of selected  
116 variables on mortality. Statistical significance was set at  $p \leq 0.05$ . All calculations were made using  
117 the SPSS 25.0 statistical package (SPSS Inc., Chicago, IL, USA).

## 118 **Results**

119 The raw data of this study are as Supporting Information. During the study period, 468  
120 patients with SARS-Co-V2 infection, confirmed by RT-PCR, were admitted to the hospital. The  
121 seasonal distribution of hospital admissions is shown in Figure 1. The first wave peaked at the end  
122 of March and was followed by a progressive decrease with very few patients being admitted in May  
123 and June. The number of cases fluctuated upward from mid-July until a sharp increase in mid-  
124 October. The number of patients admitted was 204 in the first wave and 264 in the second one.  
125 Those in the second wave were significantly younger ( $58 \pm 26$  vs.  $67 \pm 18$  years;  $p < 0.001$ ). A  
126 noteworthy feature of the second wave was the high number of children between 0 and 9 years of  
127 age ( $n = 21$ ), 12 of them being babies under 1 year (Figure 2). The department to which the patients  
128 were admitted is shown in Table 1. The second wave caused a significantly higher number of  
129 admissions to Gynecology, Pediatrics and Emergency Departments and fewer to Internal Medicine

130 and ICU. The duration of hospitalization was significantly shorter in the second wave ( $14 \pm 19$  vs.  
131  $22 \pm 25$  days;  $p < 0.001$ ). A total of 49 deaths occurred during the first wave and 35 during the  
132 second wave, so the case fatality rate decreased from 24.0% to 13.2%. The patients who died were  
133 significantly older than the survivors and those who died in the second wave were older than those  
134 in the first wave ( $83 \pm 10$  vs.  $78 \pm 13$  years;  $p = 0.042$ ).

135

136 **Figure 1.- Number of patients with COVID-19 admitted per day over the entire study period.**

137 **Figure 2.- Distribution by age intervals of the patients admitted for COVID-19 during the first**  
138 **and second waves.** The  $p$  values were calculated using the  $\chi^2$  test.

139 **Table 1. Distribution of the hospitalized patients in the first and second waves.**

140

| Department             | First wave<br>(n = 204) | Second wave<br>(n = 264) | p-value |
|------------------------|-------------------------|--------------------------|---------|
| Internal Medicine      | 124 (60.8)              | 123 (46.6)               | 0.004   |
| Intermediate Care Unit | 42 (20.6)               | 47 (17.8)                | 0.596   |
| Intensive Care Unit    | 35 (17.1)               | 19 (7.2)                 | 0.029   |
| Emergency Unit         | 0 (0.0)                 | 33 (12.5)                | N.A.    |
| Pediatrics             | 0 (0.0)                 | 22 (8.3)                 | N.A.    |
| Gynecology             | 0 (0.0)                 | 10 (3.8)                 | N.A.    |
| Surgery                | 1 (0.5)                 | 5 (1.9)                  | 0.102   |
| Oncology               | 1 (0.5)                 | 3 (1.1)                  | 0.317   |
| Traumatology           | 1 (0.5)                 | 2 (0.8)                  | 0.564   |

141

142 Statistical analysis was performed by the  $\chi^2$  test. Results are shown as number of cases and percentages (in parenthesis).  
143 N.A.: Not applicable. The statistical test cannot be performed when one of the variables is equal to 0.

144

145 The relationships between COVID-19 and the clinical and epidemiological variables are  
146 shown in Figure 3 and Table 2. The most frequent signs and symptoms in both waves were fever,  
147 dyspnea, pneumonia, and cough (Figure 3A). The most relevant comorbidities were cardiovascular  
148 diseases, type 2 diabetes mellitus, and chronic neurological diseases (Figure 3B). Patients from the  
149 second wave differed from those of the first wave in that they more frequently presented a higher  
150 frequency of vomiting, asthenia, abdominal pain, rhinorrhea, or acute kidney failure, and less  
151 frequently a cough or chills. There was no significant difference in the frequency of concomitant  
152 chronic diseases. One result that we consider noteworthy is the considerably higher frequency in the  
153 second wave of pregnant women who went to the hospital to give birth and post-partum women.

154 **Figure 3.- Distribution of symptoms and diseases associated with SARS-CoV-2 infection (A)**  
 155 **and comorbidities and gestational variables (B) in patients admitted for COVID-19 during the**  
 156 **first and second waves.** The  $p$  values were calculated using the  $\chi^2$  test. AKF, acute kidney failure;  
 157 ARDS, acute respiratory distress syndrome; CKD, chronic kidney disease; CLD, chronic liver  
 158 disease; CLUD, chronic lung disease; CND, chronic neurological disease; CVD, cardiovascular  
 159 disease; T2DM, type 2 diabetes mellitus.

160 **Table 2. Clinical and epidemiological characteristics of patients with COVID-19 infection.**  
 161

| Feature                                         | First wave<br>(n = 204) | Second wave<br>(n = 264) | $p$ -value |
|-------------------------------------------------|-------------------------|--------------------------|------------|
| <b>Epidemiological characteristics</b>          |                         |                          |            |
| Age                                             | 67 ± 18                 | 58 ± 26                  | < 0.001    |
| Gender, male                                    | 114 (55.9)              | 144 (54.5)               | 0.423      |
| Smoking habit                                   | 10 (4.9)                | 27 (13.2)                | < 0.001    |
| Alcohol consumption                             | 10 (4.9)                | 15 (7.3)                 | 0.421      |
| <b>Signs and symptoms</b>                       |                         |                          |            |
| Fever                                           | 134 (65.6)              | 170 (64.3)               | 0.845      |
| Dyspnea                                         | 122 (59.8)              | 134 (50.7)               | 0.061      |
| Pneumonia                                       | 119 (58.3)              | 140 (53.8)               | 0.262      |
| Cough                                           | 103 (50.5)              | 107 (40.5)               | 0.039      |
| Diarrhea                                        | 44 (21.5)               | 46 (17.4)                | 0.288      |
| Chills                                          | 42 (20.5)               | 7 (2.6)                  | < 0.001    |
| Acute kidney failure                            | 22 (10.2)               | 46 (17.4)                | 0.048      |
| Odynophagia                                     | 14 (6.8)                | 15 (5.6)                 | 0.700      |
| Acute respiratory distress syndrome             | 10 (4.9)                | 17 (6.4)                 | 0.552      |
| Vomiting                                        | 9 (4.4)                 | 39 (14.7)                | < 0.001    |
| Other symptoms <sup>1</sup>                     | 12 (5.8)                | 69 (26.1)                | < 0.001    |
| <b>Comorbidities and gestational variables</b>  |                         |                          |            |
| Cardiovascular disease (including hypertension) | 108 (52.9)              | 144 (54.5)               | 0.502      |
| Type 2 diabetes mellitus                        | 56 (27.4)               | 64 (24.2)                | 0.456      |
| Chronic neurological disease                    | 45 (22.0)               | 52 (19.7)                | 0.429      |
| Chronic kidney disease                          | 32 (15.6)               | 34 (12.9)                | 0.359      |
| Chronic lung disease                            | 31 (15.2)               | 47 (17.8)                | 0.401      |
| Cancer                                          | 29 (14.2)               | 43 (16.3)                | 0.816      |
| Other infectious diseases                       | 6 (2.9)                 | 10 (3.8)                 | 0.464      |
| Chronic liver disease                           | 5 (2.4)                 | 17 (6.4)                 | 0.069      |
| Postpartum (< 6 weeks)                          | 2 (0.9)                 | 15 (5.7)                 | 0.024      |
| Pregnancy                                       | 1 (0.4)                 | 12 (4.5)                 | 0.016      |

162 Statistical analysis was performed by the  $\chi^2$  test (categorical variables) or the Student's  $t$  test (quantitative variables).  
 163 Results are shown as number of cases and percentages (in parenthesis) or as means ± standard deviations.  
 164

165 <sup>1</sup> Asthenia, rhinorrhea or abdominal pain.

166 We also evaluated the differences in treatments between the two groups of patients. Subjects  
 167 from the second wave were treated more often with non-invasive mechanical ventilation and  
 168 corticoids, and less often with invasive mechanical ventilation, conventional oxygen therapy and  
 169 anticoagulants (Table 3). Regarding other treatments, patients in the first wave received lopinavir,  
 170 ritonavir and hydroxychloroquine, while those in the second wave received remdesivir and  
 171 tocilizumab.

172 **Table 3. Main treatments of patients with COVID-19 infection.**  
 173

| Treatment                          | First wave<br>(n = 204) | Second wave<br>(n = 264) | p-value |
|------------------------------------|-------------------------|--------------------------|---------|
| Noninvasive mechanical ventilation | 7 (3.4)                 | 25 (9.5)                 | 0.007   |
| Invasive mechanical ventilation    | 27 (13.2)               | 11 (4.2)                 | < 0.001 |
| High-flow oxygen therapy           | 18 (8.8)                | 28 (10.6)                | 0.315   |
| Conventional oxygen therapy        | 155 (76.0)              | 156 (59.1)               | < 0.001 |
| Anticoagulants                     | 184 (90.2)              | 188 (71.2)               | < 0.001 |
| Corticosteroids                    | 86 (42.2)               | 156 (59.1)               | < 0.001 |

174 Statistical analysis was performed by the  $\chi^2$  test. Results are shown as number of cases and percentages (in parenthesis).  
 175  
 176

177 Finally, we wanted to identify which factors were the most important determinants of death  
 178 in the two groups of patients. Logistic regression analyses highlighted the importance of age, fever,  
 179 dyspnea, acute respiratory distress syndrome, type 2 diabetes mellitus, and cancer in the first wave  
 180 (Table 4), and of age, gender, smoking habit, acute respiratory distress syndrome, and chronic  
 181 neurological diseases in the second wave (Table 5).

182 **Table 4. Logistic regression analysis on the relationships of comorbidities with deaths for patients from the first**  
 183 **wave of COVID-19.**  
 184

| Variable            | B      | SE    | Exp (B) | p-value |
|---------------------|--------|-------|---------|---------|
| Age                 | 0.096  | 0.024 | 1.101   | < 0.001 |
| Gender              | 0.365  | 0.517 | 1.441   | 0.480   |
| Smoking habit       | 0.060  | 0.352 | 1.062   | 0.865   |
| Alcohol consumption | -0.570 | 0.468 | 0.565   | 0.223   |
| Fever               | 2.138  | 0.658 | 8.481   | 0.001   |
| Cough               | 0.238  | 0.581 | 1.269   | 0.682   |
| Pneumonia           | -1.139 | 0.651 | 0.320   | 0.080   |

|                                     |         |           |                       |         |
|-------------------------------------|---------|-----------|-----------------------|---------|
| Odynophagia                         | -2.107  | 1.148     | 0.122                 | 0.067   |
| Chills                              | -1.288  | 0.760     | 0.276                 | 0.090   |
| Dyspnea                             | 1.365   | 0.628     | 3.915                 | 0.030   |
| Vomiting                            | -1.132  | 1.481     | 0.322                 | 0.445   |
| Diarrhea                            | -0.846  | 0.657     | 0.429                 | 0.198   |
| Acute respiratory distress syndrome | 3.606   | 1.185     | 36.828                | 0.002   |
| Acute kidney failure                | 0.442   | 0.769     | 1.556                 | 0.565   |
| Other symptoms <sup>1</sup>         | 0.192   | 0.964     | 1.211                 | 0.843   |
| Type 2 diabetes mellitus            | 1.298   | 0.505     | 3.662                 | 0.010   |
| Cardiovascular diseases             | 0.114   | 0.559     | 1.121                 | 0.839   |
| Chronic liver diseases              | 0.122   | 1.371     | 1.130                 | 0.929   |
| Chronic lung diseases               | -0.458  | 0.682     | 0.632                 | 0.502   |
| Chronic kidney diseases             | -0.256  | 0.665     | 0.774                 | 0.701   |
| Chronic neurological diseases       | -0.547  | 0.598     | 0.579                 | 0.360   |
| Other infectious diseases           | 0.476   | 1.705     | 1.610                 | 0.780   |
| Cancer                              | 1.518   | 0.595     | 4.565                 | 0.011   |
| Pregnancy                           | -31.735 | 42695.071 | 0.000                 | 0.999   |
| Postpartum                          | 20.726  | 40192.969 | 0.1 x 10 <sup>9</sup> | 1.000   |
| Constant                            | -10.394 | 2.044     | 0.000                 | < 0.001 |

185

186

187

188

189

190

191

192

Model summary: log-likelihood(-2) = 136.623;  $r^2$  Cox & Snell = 0.343;  $r^2$  Nagelkerke = 0.515;  $p < 0.001$ . B: Non-standardized  $\beta$  coefficient. SE: Standard error of B.

<sup>1</sup> Asthenia, rinorrhea or abdominal pain.

**Table 5. Logistic regression analysis on the relationships of comorbidities with deaths for patients from the second wave of COVID-19.**

| Variable                            | B       | SE        | Exp (B) | p-value |
|-------------------------------------|---------|-----------|---------|---------|
| Age                                 | 0.094   | 0.030     | 1.098   | 0.002   |
| Gender                              | 1.755   | 0.716     | 5.782   | 0.014   |
| Smoking habit                       | -2.874  | 1.446     | 0.056   | 0.047   |
| Alcohol consumption                 | 0.558   | 0.789     | 1.747   | 0.479   |
| Fever                               | -0.583  | 0.756     | 0.558   | 0.441   |
| Cough                               | -0.173  | 0.641     | 0.841   | 0.787   |
| Pneumonia                           | 0.186   | 0.744     | 1.204   | 0.803   |
| Odynophagia                         | -16.683 | 8820.456  | 0.000   | 0.998   |
| Chills                              | -18.312 | 12533.763 | 0.000   | 0.999   |
| Dyspnea                             | -0.305  | 0.708     | 0.737   | 0.666   |
| Vomiting                            | -1.544  | 1.335     | 0.214   | 0.247   |
| Diarrhea                            | -1.329  | 1.319     | 0.265   | 0.313   |
| Acute respiratory distress syndrome | 2.242   | 0.988     | 9.410   | 0.023   |

|                               |         |           |        |         |
|-------------------------------|---------|-----------|--------|---------|
| Acute kidney failure          | 0.195   | 0.765     | 1.216  | 0.799   |
| Other symptoms <sup>1</sup>   | 0.485   | 0.605     | 1.624  | 0.423   |
| Type 2 diabetes mellitus      | 0.183   | 0.599     | 1.201  | 0.759   |
| Cardiovascular diseases       | 0.276   | 0.832     | 1.318  | 0.740   |
| Chronic liver diseases        | 2.419   | 1.249     | 11.234 | 0.053   |
| Chronic lung diseases         | 0.178   | 0.697     | 1.195  | 0.799   |
| Chronic kidney diseases       | 0.234   | 0.835     | 1.264  | 0.779   |
| Chronic neurological diseases | 1.945   | 0.723     | 6.993  | 0.007   |
| Other infectious diseases     | 2.042   | 1.451     | 7.704  | 0.160   |
| Cancer                        | 0.289   | 0.626     | 1.335  | 0.644   |
| Pregnancy                     | -11.766 | 10235.783 | 0.000  | 0.999   |
| Postpartum                    | -0.555  | 0.542     | 0.574  | 0.306   |
| Constant                      | -10.590 | 2.789     | 0.000  | < 0.001 |

193

194 Model summary: log-likelihood(-2) = 98.286;  $r^2$  Cox & Snell = 0.318;  $r^2$  Nagelkerke = 0.597;  $p < 0.001$ . B: Non-  
195 standardized  $\beta$  coefficient. SE: Standard error of B.

196 <sup>1</sup> Asthenia, rinorrhea or abdominal pain.

197

## 198 Discussion

199 We have previously reported the main epidemiological and clinical characteristics and the  
200 mortality risk factors of the first wave patients during a month and a half between March and April  
201 [11]. In the present investigation we extended the study to mid-October to cover two equal periods  
202 of three and a half months. More patients were admitted during the second wave, they were younger  
203 and there were fewer deaths, in agreement with results reported by previous research in several  
204 countries [2,3,12]. The reasons for the clear differences between the two periods are not yet known  
205 although it has been suggested that a new variant of SARS-CoV-2 emerged in early summer 2020 in  
206 Spain [9], a variant that was linked to outbreaks among young agricultural workers in the north-east  
207 of the country. Transmission to the general population in that area was then replicated across the  
208 country. Furthermore, poor compliance with social distancing guidelines by young people might  
209 have facilitated contagion in young, healthy adults and children [2,13]. The decrease in the age of  
210 the patients then resulted in a decrease in the case fatality rate in that those patients who died were

211 on average 5 years older than the victims of the first wave. Moreover, fewer patients required  
212 respiratory assistance via invasive mechanical ventilation methods. This improvement in the results  
213 of admitted patients might be linked to the fact that the health system in our country, as in many  
214 others, has since become better prepared. We have more experience and better treatment regimens,  
215 and we carry out more diagnostic tests, allowing serious cases to be detected early and to receive  
216 more effective treatments. In this regard, during the second period, patients were treated more  
217 frequently with dexamethasone, as suggested by the RECOVERY study [14], and  
218 hydroxychloroquine and loponavir-ritonavir were substituted by remdesivir and tocilizumab, which  
219 several studies have reported to be more effective than in preventing death and shortening the  
220 duration of hospital stays [15-17]. Another factor that might have contributed to the decrease in the  
221 case fatality rate is the improvement in environmental conditions. For example, warm weather and  
222 improved air quality following the city lockdown have been reported to correlate negatively with  
223 SARS-CoV-2 transmissibility [18-20].

224 A new and remarkable characteristic of the incidence of COVID-19 in this second wave in  
225 our population is the higher incidence in babies, children and pregnant women who went to the  
226 hospital to give birth or in post-partum women. The vast majority of these patients did not present  
227 serious symptoms and so did not require hospitalization for more than 4 days. There were no deaths  
228 among children up to 9 years of age, pregnant or post-partum women. The predominant symptom  
229 presented by the children was fever (19 out of 21 cases, 90.5%), while pregnant and post-partum  
230 women (13 and 17 cases, respectively) were asymptomatic and promptly discharged. These results  
231 highlight the role of family contact in the transmission of the virus and agree with previous reports  
232 that have indicated the generally low severity of the disease in these patients [21-24].

233 The predominant symptoms of infection (fever, dyspnea, pneumonia cough) were similar in  
234 both waves, although the patients in the second wave presented renal (acute kidney failure) and  
235 gastrointestinal symptoms (vomiting, abdominal pain) more frequently. Indeed, the Spanish  
236 Ministry of Health has already highlighted, in a document updated on 2<sup>nd</sup> October, the higher

237 incidence of the latter in the second wave [25]. The present study did not find any differences  
238 between the frequency of concomitant diseases in the two waves, similar findings to those of our  
239 preliminary study [9]. In this respect, we differ from a previous study conducted in Japan that has  
240 reported a lower incidence of cardiovascular and cerebrovascular diseases [3].

241 Lastly, regarding the risk factors associated with mortality, we also found differences  
242 between the first and second waves. Multiple regression analysis showed that older age and the  
243 presence of fever, dyspnea, acute respiratory distress syndrome, diabetes, and cancer were  
244 independently associated with higher mortality in the first wave, while age, gender, and the  
245 presence of acute respiratory distress syndrome and chronic neurological diseases were associated  
246 with mortality in the second. This might be a reflection of a better management of cancer or  
247 diabetes patients. On the other hand, the association of neurological diseases with mortality might  
248 be due to the higher mean age of those who died in this second wave.

## 249 **Conclusion**

250 The results of the present study show that hospitalized patients in the second wave were  
251 younger, required fewer days of hospitalization, had lower mortality rates and treatments were more  
252 effective and less intensive. Although the majority of symptoms were similar in both periods, the  
253 higher incidence of gastrointestinal symptoms in the second wave stands out as a difference.  
254 Comorbidities were similar, but there were differences between those associated with mortality,  
255 highlighting the importance of chronic neurological diseases in this second wave. An important  
256 difference was the high incidence of babies, children and pregnant and post-partum women  
257 admitted but, in general, these cases were not serious and were resolved promptly and successfully.  
258 These results might help to understand the characteristics of this second wave and the behaviour  
259 and danger of SARS-CoV-2 in the Mediterranean area and in Western Europe generally. Further  
260 studies are needed to confirm our findings.

## 261 **Acknowledgments**

262           The authors are indebted to all the staff of the *Hospital Universitari de Sant Joan*, doctors,  
263 nurses, assistants, cleaning and security personnel, and all the volunteer students, who with their  
264 enormous effort are managing to overcome this dramatic situation. Editorial assistance was  
265 provided by Phil Hoddy at the Service of Linguistic Resources of the *Universitat Rovira i Virgili*.

## 266 **CRedit authorship contribution statement**

267 **Simona Iftimie:** Conceptualization, Data curation, Formal analysis, Investigation, Methodology,  
268 Project administration, Resources, Supervision, Validation, Funding acquisition, Writing-original  
269 draft, Writing-review & editing. **Ana F. López-Azcona:** Data curation, Investigation, Methodology,  
270 Writing-review & editing. **Immaculada Vallverdú:** Investigation, Resources. **Salvador**  
271 **Hernández-Flix:** Investigation, Resources. **Gabriel de Febrer:** Investigation, Resources. **Sandra**  
272 **Parra:** Investigation, Resources. **Anna Hernández-Aguilera:** Data curation, Investigation,  
273 Methodology, Writing-original draft, Writing-review & editing. **Francesc Riu:** Investigation,  
274 Resources. **Jorge Joven:** Investigation, Resources. **Jordi Camps:** Conceptualization, Data  
275 curation, Formal analysis, Investigation, Methodology, Project administration, Resources,  
276 Supervision, Validation, Funding acquisition, Writing-original draft, Writing-review & editing,  
277 Supervision. **Antoni Castro:** Investigation, Resources, Funding acquisition, Writing-review &  
278 editing.

## 279 **Declaration of Competing Interest**

280 The authors declare that there are no competing interests.

## 281 **Data availability**

282 All relevant data are within the manuscript and its Supporting Information files.

## 283 **References**

- 284 1. Vahidy FS, Drews AL, Masud FN, Schwartz RL, Boom ML, Phillips RA, et al. Characteristics  
285 and outcomes of COVID-19 patients during initial peak and resurgence in the Houston  
286 metropolitan area. *JAMA*. 2020; 324: 998-1000. <https://doi.org/10.1001/jama.2020.15301>.
- 287 2. Fan G, Yang Z, Lin Q, Zhao S, Yang L, He D. Decreased case fatality rate of COVID-19 in the  
288 second wave: a study in 53 countries or regions. *Transbound Emerg Dis*. 2020;  
289 <https://doi.org/10.1111/tbed.13819>. Epub ahead of print.
- 290 3. Saito S, Asai Y, Matsunaga N, Hayakawa K, Terada M, Ohtsu H, et al. First and second  
291 COVID-19 waves in Japan: A comparison of disease severity and characteristics: Comparison of  
292 the two COVID-19 waves in Japan. *J Infect*. 2020: S0163-4453(20)30693-9.  
293 <https://doi.org/10.1016/j.jinf.2020.10.033>.
- 294 4. Renardy M, Eisenberg M, Kirschner D. Predicting the second wave of COVID-19 in  
295 Washtenaw County, MI. *J Theor Biol*. 2020; 507: 110461. <https://doi.org/10.1016/j.jtbi.2020.110461>.
- 296 5. Looi MK. Covid-19: Is a second wave hitting Europe? *BMJ*. 2020 ; 371: m4113. <https://doi.org/10.1136/bmj.m4113>.
- 297 6. Win A. Rapid Rise of COVID-19 second wave in Myanmar and implications for the Western  
298 Pacific Region. *QJM*. 2020; hcaa290. <https://doi.org/10.1093/qjmed/hcaa290>.
- 301 7. Ballester-Arnal R, Gil-Llario MD. The virus that changed Spain: Impact of COVID-19 on  
302 people with HIV. *AIDS Behav*. 2020; 1-5. <https://doi.org/10.1007/s10461-020-02877-3>.
- 303 8. Long SW, Olsen RJ, Christensen PA, Bernard DW, Davis JJ, Shukla M, et al. Molecular  
304 architecture of early dissemination and massive second wave of the SARS-CoV-2 virus in a  
305 major metropolitan area. *mBio*. 2020; 11: e02707-20. <https://doi.org/10.1128/mBio.02707-20>.
- 306 9. Hodcroft EB, Zuber M, Nadeau S, Comas I, González Candelas F, et al. Emergence and spread  
307 of a SARS-CoV-2 variant through Europe in the summer of 2020. *medRxiv*.

- 308 2020.10.25.20219063 [Preprint]. 2020 [cited 2020 November 18]. Available from:  
309 <https://doi.org/10.1101/2020.10.25.20219063>.
- 310 10. Yang J, Chen X, Deng X, Chen Z, Gong H, Yan H, et al. Disease burden and clinical severity of  
311 the first pandemic wave of COVID-19 in Wuhan, China. *Nat Commun.* 2020; 11: 5411.  
312 <https://doi.org/10.1038/s41467-020-19238-2>.
- 313 11. Iftimie S, López-Azcona AF, Vicente-Miralles M, Descarrega-Reina R, Hernández-Aguilera A,  
314 Riu F, et al. Risk factors associated with mortality in hospitalized patients with SARS-CoV-2  
315 infection. A prospective, longitudinal, unicenter study in Reus, Spain. *PLoS One.* 2020; 15:  
316 e0234452. <https://doi.org/10.1371/journal.pone.0234452>.
- 317 12. Buonanno P, Galletta S, Puca M. Spatial dynamics of SARS-CoV-2 and reduced risk of  
318 contagion: evidence from the second Italian epidemic wave. *medRxiv* 2020.11.08.20227934  
319 [Preprint]. 2020 [cited 2020 November 18]. Available from:  
320 <https://doi.org/10.1101/2020.11.08.20227934>.
- 321 13. Aleta A, Moreno Y. Age differential analysis of COVID-19 second wave in Europe reveals  
322 highest incidence among young adults. *medRxiv* 2020.11.11.20230177 [Preprint]. 2020 [cited  
323 2020 November 18]. Available from: <https://doi.org/10.1101/2020.11.11.20230177>.
- 324 14. RECOVERY Collaborative Group. Horby P, Lim WS, Emberson JR, Mafham M, Bell JL,  
325 Linsell L. Dexamethasone in hospitalized patients with Covid-19—preliminary report. *N Engl J*  
326 *Med.* 2020; July 17 <https://doi.org/10.1056/NEJMoa2021436>. [Epub ahead of print].
- 327 15. Costanzo M, De Giglio MAR, Roviello GN. SARS-CoV-2: Recent reports on antiviral  
328 therapies based on lopinavir/ritonavir, darunavir/umifenovir, hydroxychloroquine, remdesivir,  
329 favipiravir and other drugs for the treatment of the new coronavirus. *Curr Med Chem.* 2020; 27:  
330 4536-4541. <https://doi.org/10.2174/0929867327666200416131117>.
- 331 16. RECOVERY Collaborative Group. Lopinavir-ritonavir in patients admitted to hospital with  
332 COVID-19 (RECOVERY): a randomised, controlled, open-label, platform trial. *Lancet.* 2020;  
333 396: 1345-1352. [https://doi.org/10.1016/S0140-6736\(20\)32013-4](https://doi.org/10.1016/S0140-6736(20)32013-4).

- 334 17. Lam S, Lombardi A, Ouanounou A. COVID-19: A review of the proposed pharmacological  
335 treatments. *Eur J Pharmacol.* 2020; 886: 173451. [https://doi: 10.1016/j.ejphar.2020.173451](https://doi.org/10.1016/j.ejphar.2020.173451).
- 336 18. Ran J, Zhao S, Han L, Liao G, Wang K, Wang MH, et al. A re-analysis in exploring the  
337 association between temperature and COVID-19 transmissibility: an ecological study with 154  
338 Chinese cities. *Eur Respir J.* 2020; 56: 2001253. [https://doi: 10.1183/13993003.01253-2020](https://doi.org/10.1183/13993003.01253-2020).
- 339 19. Ran J, Zhao S, Han L, Chen D, Yang Z, Yang L, et al. The ambient ozone and COVID-19  
340 transmissibility in China: A data-driven ecological study of 154 cities. *J Infect.* 2020; 81: e9-e11.  
341 [https://doi: 10.1016/j.jinf.2020.07.011](https://doi.org/10.1016/j.jinf.2020.07.011).
- 342 20. Ran J, Zhao S, Han L, Qiu Y, Cao P, Yang Z, et al. Effects of particulate matter exposure on the  
343 transmissibility and case fatality rate of COVID-19: A Nationwide Ecological Study in China. *J*  
344 *Travel Med.* 2020; 27: taaa133. [https:// doi: 10.1093/jtm/taaa133](https://doi.org/10.1093/jtm/taaa133).
- 345 21. Dong Y, Mo X, Hu Y, Qi X, Jiang F, Jiang Z, et al. Epidemiology of COVID-19 among children  
346 in China. *Pediatrics.* 2020; 145: e20200702. [https://doi: 10.1542/peds.2020-0702](https://doi.org/10.1542/peds.2020-0702).
- 347 22. Shen KL, Yang YH, Jiang RM, Wang TY, Zhao DC, Jiang Y, et al. Updated diagnosis, treatment  
348 and prevention of COVID-19 in children: experts' consensus statement (condensed version of  
349 the second edition). *World J Pediatr.* 2020;16: 232-239. [https://doi: 10.1007/s12519-020-00362-](https://doi.org/10.1007/s12519-020-00362-4)  
350 4.
- 351 23. Schwartz DA. An analysis of 38 pregnant women with COVID-19, their newborn infants, and  
352 maternal-fetal transmission of SARS-CoV-2: Maternal coronavirus infections and pregnancy  
353 outcomes. *Arch Pathol Lab Med.* 2020 Mar 17. [https://doi: 10.5858/arpa.2020-0901-SA](https://doi.org/10.5858/arpa.2020-0901-SA). Epub  
354 ahead of print.
- 355 24. Qiao J. What are the risks of COVID-19 infection in pregnant women? *Lancet.* 2020; 395: 760-  
356 762. [https://doi: 10.1016/S0140-6736\(20\)30365-2](https://doi.org/10.1016/S0140-6736(20)30365-2).
- 357 25. Spanish Ministry of Health. Questions and answers about the new coronavirus (COVID-19).  
358 Updated October 2, 2020. 2020; 1-4. Available from:

359 <https://www.mscbs.gob.es/profesionales/saludPublica/ccayes/alertasActual/nCov/documentos/2>  
360 [020\\_10\\_05\\_Preguntas\\_respuestas\\_2019-nCoV-2.pdf](#).  
361  
362
